# Supplementary material for: The Cocktail Effects on the Acute Cytotoxicity of Pesticides and Pharmaceuticals Frequently Detected in the Environment
Source: MDPI journal article supplement (doi:10.3390/toxics12030189), 2024-02-28
Supplement: s1 [file s1]

# The Cocktail Effects on the Acute Cytotoxicity of Pesticides and Pharmaceuticals Frequently Detected in the Environment

Balázs Göbölös <sup>1</sup>, Rózsa E. Sebők <sup>1</sup>, Gyula Szabó <sup>2</sup>, Gergő Tóth <sup>1,\*</sup>, Sándor Szoboszlay <sup>1</sup>, Balázs Kriszt <sup>1</sup>, Edit Kaszab <sup>1</sup> and Judit Háhn <sup>1</sup>

- <sup>1</sup> Department of Environmental Safety, Institute of Aquaculture and Environmental Safety, Hungarian University of Agriculture and Life Sciences, 1 Páter Károly u., 2100 Gödöllő, Hungary; gobolos.balazs@uni-mate.hu (B.G.); rozsa.sebok@gmail.com (R.E.S.); szoboszlay.sandor@uni-mate.hu (S.S.); kriszt.balazs@uni-mate.hu (B.K.); kaszab.edit@uni-mate.hu (E.K.); hahn.judit@uni-mate.hu (J.H.)
- <sup>2</sup> Department of Environmental Toxicology, Institute of Aquaculture and Environmental Safety, Hungarian University of Agriculture and Life Sciences, 1 Páter Károly u., 2100 Gödöllő, Hungary; gyula.szabo.mate@gmail.com
- \* Correspondence: toth.gergo@uni-mate.hu

## Supplementary Tables

**Table S1.** Name, CAS number, IUPAC name, structure and LD<sub>50</sub> of tested compounds carbamazepine, diclofenac, ibuprofen, S-metolachlor, tebuconazole, terbuthylazine.

| Name          | CAS Number | IUPAC Name                                     | Structure                                                                            | Oral LD <sub>50</sub><br>Rat mg/kg | References                                                                                                                                                                                                                                                                                              |
|---------------|------------|------------------------------------------------|--------------------------------------------------------------------------------------|------------------------------------|---------------------------------------------------------------------------------------------------------------------------------------------------------------------------------------------------------------------------------------------------------------------------------------------------------|
| Carbamazepine | 298-46-4   | benzo[b][1] benzazepine-11-carboxamide         | 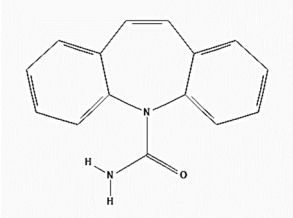 | 1957                               | National Center for Biotechnology Information (2024). PubChem Compound Summary for CID 2554, Carbamazepine. Retrieved 17 January 2024 from <a href="https://pubchem.ncbi.nlm.nih.gov/compound/Carbamazepine">https://pubchem.ncbi.nlm.nih.gov/compound/Carbamazepine</a> (accessed on 23 January 2024). |
| Diclofenac    | 15307-86-5 | 2-[2-(2,6-dichloroanilino) phenyl] acetic acid |  | 62.5                               | National Center for Biotechnology Information (2024). PubChem Compound Summary for CID 3033, Diclofenac. Retrieved January 17, 2024 from <a href="https://pubchem.ncbi.nlm.nih.gov/compound/Diclofenac">https://pubchem.ncbi.nlm.nih.gov/compound/Diclofenac</a> (accessed on 23 January 2024).         |

|                |             |                                                                            |                                                                                      |      |                                                                                                                                                                                                                                                                                                                                                                                                                                                                                                                                                                                                                                                                     |
|----------------|-------------|----------------------------------------------------------------------------|--------------------------------------------------------------------------------------|------|---------------------------------------------------------------------------------------------------------------------------------------------------------------------------------------------------------------------------------------------------------------------------------------------------------------------------------------------------------------------------------------------------------------------------------------------------------------------------------------------------------------------------------------------------------------------------------------------------------------------------------------------------------------------|
| Ibuprofen      | 15687-27-1  | 2-[4-(2-methylpropyl)phenyl]propanoic acid                                 | 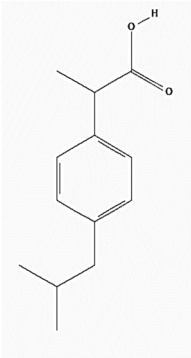    | 636  | National Center for Biotechnology Information (2024). PubChem Compound Summary for CID 3672, Ibuprofen. Retrieved January 17, 2024 from <a href="https://pubchem.ncbi.nlm.nih.gov/compound/Ibuprofen">https://pubchem.ncbi.nlm.nih.gov/compound/Ibuprofen</a> (accessed on 23 January 2024).                                                                                                                                                                                                                                                                                                                                                                        |
| S-metolachlor  | 87392-12-9  | 2-chloro-N-(2-ethyl-6-methylphenyl)-N-[(2S)-1-methoxypropan-2-yl]acetamide |   | 2780 | National Center for Biotechnology Information (2024). PubChem Compound Summary for CID 11140605, S-Metolachlor. Retrieved January 17, 2024 from <a href="https://pubchem.ncbi.nlm.nih.gov/compound/S-Metolachlor">https://pubchem.ncbi.nlm.nih.gov/compound/S-Metolachlor</a> (accessed on 23 January 2024). United States Environmental Protection Agency (2024). Retrieved January 17, 2024 from <a href="https://www3.epa.gov/pesticides/endanger/litstatus/effects/redleg-frog/2010/metolachlor-s/appendix-j1.pdf">https://www3.epa.gov/pesticides/endanger/litstatus/effects/redleg-frog/2010/metolachlor-s/appendix-j1.pdf</a> (accessed on 23 January 2024). |
| Tebuconazole   | 107534-96-3 | 1-(4-chlorophenyl)-4,4-dimethyl-3-(1,2,4-triazol-1-ylmethyl)pentan-3-ol    |   | 3352 | National Center for Biotechnology Information (2024). PubChem Compound Summary for CID 86102, Tebuconazole. Retrieved January 17, 2024 from <a href="https://pubchem.ncbi.nlm.nih.gov/compound/Tebuconazole">https://pubchem.ncbi.nlm.nih.gov/compound/Tebuconazole</a> (accessed on 23 January 2024).                                                                                                                                                                                                                                                                                                                                                              |
| Terbuthylazine | 5915-41-3   | 2-N-tert-butyl-6-chloro-4-N-ethyl-1,3,5-triazine-2,4-diamine               |  | 1845 | National Center for Biotechnology Information (2024). PubChem Compound Summary for CID 22206, Terbuthylazine. Retrieved January 17, 2024                                                                                                                                                                                                                                                                                                                                                                                                                                                                                                                            |

**Table S2.** Acute cytotoxicity of the test chemicals alone and in mixtures. Concentrations are expressed in mg/L resulting in 10, 20, 50, 80, 90, and 95% bioluminescence inhibition in *Aliivibrio fischeri* after 30 minutes of exposure. 1: carbamazepine, 2: diclofenac, 3: ibuprofen, 4: S-metolachlor, 5: tebuconazole, 6: terbutylazine. N.t. – non-toxic at the applied concentration.

|             | EC <sub>10</sub> | EC <sub>20</sub> | EC <sub>50</sub> | EC <sub>80</sub> | EC <sub>90</sub> | EC <sub>95</sub> |
|-------------|------------------|------------------|------------------|------------------|------------------|------------------|
|             | mg/L             |                  |                  |                  |                  |                  |
| CBZ         | 4                | 14               | 86               | 520              | 1478             | 3866             |
| DCF         | 7                | 13               | 27               | 50               | 77               | 107              |
| IBU         | 2                | 5                | 23               | 96               | 222              | 471              |
| MTC         | 55               | 100              | 265              | 715              | n.t.             | n.t.             |
| TBZ         | 8                | 14               | 32               | 74               | 120              | 188              |
| TRB         | n.t.             | n.t.             | n.t.             | n.t.             | n.t.             | n.t.             |
| CBZ+DCF     | 12               | 16               | 28               | 50               | 70               | 94               |
| CBZ+IBU     | 6                | 12               | 40               | 120              | 230              | 418              |
| CBZ+MTC     | 16               | 32               | 88               | 232              | 408              | 688              |
| CBZ+TBZ     | 24               | 32               | 52               | 80               | 108              | 136              |
| CBZ+TRB     | 18               | 36               | 120              | n.t.             | n.t.             | n.t.             |
| DCF+IBU     | 2                | 4                | 12               | 26               | 40               | 62               |
| DCF+MTC     | 10               | 14               | 28               | 56               | 84               | 120              |
| DCF+TBZ     | 12               | 18               | 34               | 64               | 92               | 126              |
| DCF+TRB     | 4                | 10               | 32               | 102              | 202              | 380              |
| IBU+MTC     | 6                | 12               | 50               | 184              | 396              | 804              |
| IBU+TBZ     | 8                | 16               | 56               | 192              | 394              | 760              |
| IBU+TRB     | 1                | 2                | 18               | 102              | 272              | 672              |
| MTC+TBZ     | 12               | 20               | 36               | 64               | 88               | 116              |
| MTC+TRB     | 30               | 80               | 428              | 2278             | 6054             | 14896            |
| TBZ+TRB     | 6                | 16               | 76               | 350              | 850              | 1918             |
| CBZ+DCF+IBU | 4                | 6                | 12               | 24               | 38               | 54               |
| CBZ+DCF+MTC | 8                | 12               | 28               | 64               | 100              | 154              |
| CBZ+DCF+TBZ | 20               | 30               | 54               | 98               | 138              | 190              |
| CBZ+DCF+TRB | 6                | 12               | 28               | 62               | 100              | 154              |
| CBZ+IBU+MTC | 2                | 6                | 40               | 228              | 630              | 1610             |
| CBZ+IBU+TBZ | 10               | 20               | 66               | 214              | 426              | 802              |
| CBZ+IBU+TRB | 2                | 6                | 38               | 218              | 602              | 1532             |
| CBZ+MTC+TBZ | 34               | 56               | 126              | 282              | 454              | 702              |
| CBZ+MTC+TRB | 31               | 55               | 147              | 394              | 699              | 1187             |
| CBZ+TBZ+TRB | 20               | 40               | 168              | 684              | 1548             | 3288             |
| DCF+IBU+MTC | 4                | 8                | 22               | 64               | 118              | 208              |
| DCF+IBU+TBZ | 10               | 20               | 54               | 144              | 258              | 442              |
| DCF+IBU+TRB | 2                | 4                | 14               | 38               | 68               | 114              |
| DCF+MTC+TBZ | 6                | 8                | 20               | 42               | 66               | 98               |
| DCF+MTC+TRB | 3                | 6                | 22               | 82               | 177              | 360              |

|                         |    |    |     |      |      |       |
|-------------------------|----|----|-----|------|------|-------|
| DCF+TBZ+TRB             | 20 | 28 | 51  | 93   | 132  | 182   |
| IBU+MTC+TBZ             | 2  | 4  | 30  | 178  | 488  | 1240  |
| IBU+MTC+TRB             | 2  | 5  | 33  | 226  | 694  | 1953  |
| IBU+TBZ+TRB             | 7  | 15 | 50  | 169  | 345  | 665   |
| MTC+TBZ+TRB             | 32 | 52 | 114 | 250  | 394  | 598   |
| CBZ+DCF+IBU+MTC         | 10 | 14 | 30  | 64   | 96   | 140   |
| CBZ+DCF+IBU+TBZ         | 12 | 18 | 36  | 72   | 108  | 156   |
| CBZ+DCF+IBU+TRB         | 5  | 9  | 28  | 88   | 174  | 324   |
| CBZ+DCF+MTC+TBZ         | 10 | 16 | 38  | 88   | 144  | 224   |
| CBZ+DCF+MTC+TRB         | 6  | 12 | 34  | 99   | 186  | 332   |
| CBZ+DCF+TBZ+TRB         | 8  | 12 | 24  | 50   | 78   | 116   |
| CBZ+IBU+MTC+TBZ         | 4  | 12 | 58  | 254  | 598  | 1312  |
| CBZ+IBU+MTC+TRB         | 1  | 4  | 40  | 376  | 1393 | 4661  |
| CBZ+IBU+TBZ+TRB         | 2  | 8  | 48  | 294  | 842  | 2214  |
| CBZ+MTC+TBZ+TRB         | 2  | 8  | 110 | 1431 | 6415 | 25568 |
| DCF+IBU+MTC+TBZ         | 6  | 12 | 30  | 70   | 114  | 180   |
| DCF+IBU+MTC+TRB         | 2  | 6  | 20  | 62   | 124  | 232   |
| DCF+IBU+TBZ+TRB         | 3  | 6  | 17  | 55   | 107  | 199   |
| DCF+MTC+TBZ+TRB         | 4  | 8  | 27  | 91   | 186  | 360   |
| CBZ+DCF+IBU+MTC+TBZ     | 8  | 14 | 38  | 100  | 172  | 284   |
| CBZ+DCF+IBU+MTC+TRB     | 2  | 6  | 22  | 74   | 150  | 286   |
| CBZ+DCF+IBU+TBZ+TRB     | 4  | 8  | 22  | 56   | 96   | 158   |
| CBZ+DCF+MTC+TBZ+TRB     | 4  | 9  | 30  | 106  | 220  | 431   |
| CBZ+IBU+MTC+TBZ+TRB     | 2  | 6  | 42  | 290  | 886  | 2470  |
| DCF+IBU+MTC+TBZ+TRB     | 8  | 12 | 22  | 40   | 56   | 78    |
| CBZ+DCF+IBU+MTC+TBZ+TRB | 2  | 6  | 24  | 100  | 228  | 482   |

**Table S3.** Combination Indices for mixtures containing carbamazepine (CBZ), diclofenac (DCF), ibuprofen (IBU), S-metolachlor (MTC), and tebuconazole (TBZ) at effective concentration resulting in 10, 20, 50, 80, 90, and 95% inhibition in bioluminescence in *Aliivibrio fischeri*. CI values were calculated by CompuSyn software using 6 concentration-response data points (EC<sub>10</sub>, EC<sub>20</sub>, EC<sub>50</sub>, EC<sub>80</sub>, EC<sub>90</sub>, and EC<sub>95</sub>). Synergistic (CI < 0.9) and additive effects (0.9 < CI < 1.1) are indicated in bold and italics, respectively.

|             | Combination Index Values at Effective Concentrations |                  |                  |                  |                  |                  |
|-------------|------------------------------------------------------|------------------|------------------|------------------|------------------|------------------|
|             | EC <sub>10</sub>                                     | EC <sub>20</sub> | EC <sub>50</sub> | EC <sub>80</sub> | EC <sub>90</sub> | EC <sub>95</sub> |
| CBZ+DCF     | 2.142                                                | 1.301            | <b>0.749</b>     | <b>0.546</b>     | <b>0.478</b>     | <b>0.424</b>     |
| CBZ+IBU     | 2.110                                                | 1.673            | 1.172            | <b>0.755</b>     | <b>0.594</b>     | <b>0.477</b>     |
| CBZ+MTC     | 1.956                                                | 1.398            | <b>0.707</b>     | <b>0.389</b>     | <b>0.296</b>     | <b>0.243</b>     |
| CBZ+TBZ     | 4.167                                                | 2.416            | 1.143            | <b>0.622</b>     | <b>0.484</b>     | <b>0.374</b>     |
| DCF+IBU     | <b>0.607</b>                                         | <b>0.574</b>     | <b>0.525</b>     | <b>0.397</b>     | <b>0.349</b>     | <b>0.335</b>     |
| DCF+MTC     | <b>0.743</b>                                         | <b>0.668</b>     | <b>0.629</b>     | <b>0.596</b>     | <b>0.578</b>     | <b>0.554</b>     |
| DCF+TBZ     | 1.508                                                | 1.431            | 1.238            | <i>1.071</i>     | <b>0.977</b>     | <b>0.884</b>     |
| IBU+MTC     | 1.485                                                | 1.271            | 1.252            | 1.107            | <i>1.045</i>     | <i>1.003</i>     |
| IBU+TBZ     | 2.391                                                | 2.203            | 2.183            | 2.326            | 2.520            | 2.772            |
| MTC+TBZ     | <b>0.833</b>                                         | <b>0.838</b>     | <b>0.637</b>     | <b>0.480</b>     | <b>0.399</b>     | <b>0.332</b>     |
| CBZ+DCF+IBU | 1.112                                                | <b>0.728</b>     | <b>0.399</b>     | <b>0.260</b>     | <b>0.230</b>     | <b>0.199</b>     |
| CBZ+DCF+MTC | <i>1.000</i>                                         | <b>0.691</b>     | <b>0.534</b>     | <b>0.496</b>     | <b>0.481</b>     | <b>0.486</b>     |
| CBZ+DCF+TBZ | 3.186                                                | 2.363            | 1.532            | 1.157            | <i>1.009</i>     | <i>0.904</i>     |
| CBZ+IBU+MTC | <b>0.481</b>                                         | <b>0.578</b>     | <b>0.831</b>     | <i>1.063</i>     | 1.249            | 1.472            |
| CBZ+IBU+TBZ | 2.747                                                | 2.351            | 1.986            | 1.868            | 1.911            | 2.016            |
| CBZ+MTC+TBZ | 4.140                                                | 3.007            | 2.004            | 1.593            | 1.475            | 1.432            |

|                     |              |              |              |              |              |              |
|---------------------|--------------|--------------|--------------|--------------|--------------|--------------|
| DCF+IBU+MTC         | <b>0.834</b> | <b>0.792</b> | <b>0.669</b> | <b>0.681</b> | <b>0.718</b> | <b>0.781</b> |
| DCF+IBU+TBZ         | 2.428        | 2.404        | 2.144        | 2.117        | 2.216        | 2.366        |
| DCF+MTC+TBZ         | <b>0.539</b> | <b>0.451</b> | <b>0.511</b> | <b>0.488</b> | <b>0.485</b> | <b>0.473</b> |
| IBU+MTC+TBZ         | <b>0.410</b> | <b>0.381</b> | <b>0.817</b> | 1.520        | 2.208        | 3.205        |
| CBZ+DCF+IBU+MTC     | 2.130        | 1.310        | <b>0.777</b> | <b>0.542</b> | <b>0.454</b> | <b>0.403</b> |
| CBZ+DCF+IBU+TBZ     | 2.864        | 1.971        | 1.183        | <b>0.829</b> | <b>0.714</b> | <b>0.636</b> |
| CBZ+DCF+MTC+TBZ     | 1.240        | 0.986        | <b>0.844</b> | <b>0.810</b> | <b>0.818</b> | <b>0.825</b> |
| CBZ+IBU+MTC+TBZ     | <b>0.842</b> | 1.088        | 1.363        | 1.752        | 2.129        | 2.624        |
| DCF+IBU+MTC+TBZ     | 1.119        | 1.112        | 0.922        | <b>0.796</b> | <b>0.757</b> | <b>0.743</b> |
| CBZ+DCF+IBU+MTC+TBZ | 1.556        | 1.254        | 1.027        | 0.949        | 0.936        | 0.952        |

**Table S4.** Enhancement on cytotoxicity by terbuthylazine at concentrations resulting in 10, 20, 50, 80, 90, and 95% bioluminescence inhibition in *Aliivibrio fischeri* after 30 minutes of exposure. Enhancement of non-toxic terbuthylazine is expressed in percent of the required dose change of the other compounds in the mixture not containing terbuthylazine to result in the same effect size as the mixture containing it. n.e. – no enhancing effect. Carbamazepine (CBZ), diclofenac (DCF), ibuprofen (IBU), S-metolachlor (MTC), and tebuconazole (TBZ), terbuthylazine (TRB).

|                                            | EC <sub>10</sub> | EC <sub>20</sub> | EC <sub>50</sub> | EC <sub>80</sub> | EC <sub>90</sub> | EC <sub>95</sub> |
|--------------------------------------------|------------------|------------------|------------------|------------------|------------------|------------------|
| Toxicity Enhancement by Terbuthylazine (%) |                  |                  |                  |                  |                  |                  |
| CBZ+TRB                                    | n.e.             | n.e.             | n.e.             | n.e.             | n.e.             | n.e.             |
| DCF+TRB                                    | 85               | 81               | 70               | 49               | 34               | 11               |
| IBU+TRB                                    | 100              | 90               | 80               | 73               | 69               | 64               |
| MTC+TRB                                    | 86               | 80               | 60               | 20               | n.e.             | n.e.             |
| TBZ+TRB                                    | 81               | 71               | 41               | -18              | -77              | -155             |
| CBZ+DCF+TRB                                | 78               | 67               | 56               | 45               | 37               | 27               |
| CBZ+IBU+TRB                                | 85               | 78               | 58               | 19               | -16              | -63              |
| CBZ+MTC+TRB                                | 14               | 23               | 26               | 25               | 24               | 23               |
| CBZ+TBZ+TRB                                | 63               | 44               | -44              | -280             | -537             | -975             |
| DCF+IBU+TRB                                | 56               | 56               | 48               | 35               | 24               | 18               |
| DCF+MTC+TRB                                | 88               | 81               | 65               | 35               | 6                | -33              |
| DCF+TBZ+TRB                                | 27               | 31               | 33               | 36               | 36               | 36               |
| IBU+MTC+TRB                                | 88               | 82               | 70               | 45               | 22               | -8               |
| IBU+TBZ+TRB                                | 61               | 58               | 60               | 61               | 61               | 61               |
| MTC+TBZ+TRB                                | -19              | -16              | -41              | -74              | -99              | -129             |
| CBZ+DCF+IBU+TRB                            | 30               | 18               | -30              | -107             | -157             | -237             |
| CBZ+DCF+MTC+TRB                            | 58               | 46               | 32               | 13               | -5               | -21              |
| CBZ+DCF+TBZ+TRB                            | 78               | 78               | 75               | 71               | 68               | 66               |
| CBZ+IBU+MTC+TRB                            | 69               | 60               | 44               | 7                | -24              | -63              |
| CBZ+IBU+TBZ+TRB                            | 89               | 78               | 59               | 23               | -11              | -55              |
| CBZ+MTC+TBZ+TRB                            | 97               | 92               | 51               | -185             | -695             | -1898            |
| DCF+IBU+MTC+TRB                            | 72               | 58               | 49               | 46               | 41               | 37               |
| DCF+IBU+TBZ+TRB                            | 84               | 85               | 82               | 79               | 77               | 75               |
| DCF+MTC+TBZ+TRB                            | 64               | 44               | 25               | -22              | -59              | -107             |
| IBU+MTC+TBZ+TRB                            | 44               | 16               | 33               | 42               | 45               | 48               |
| CBZ+DCF+IBU+MTC+TRB                        | 87               | 73               | 53               | 26               | n.e.             | -31              |
| CBZ+DCF+IBU+TBZ+TRB                        | 79               | 72               | 61               | 50               | 43               | 35               |
| CBZ+IBU+MTC+TBZ+TRB                        | 68               | 68               | 54               | 27               | 5                | -20              |
| CBZ+DCF+MTC+TBZ+TRB                        | 73               | 66               | 49               | 23               | 2                | -23              |
| DCF+IBU+MTC+TBZ+TRB                        | 15               | 36               | 53               | 63               | 69               | 72               |
| CBZ+DCF+IBU+MTC+TBZ+TRB                    | 83               | 70               | 56               | 31               | 8                | -18              |

**Table S5.** Description of synergism or antagonism in drug combination studies analyzed with the CI method described by Chou and Talalay (Chou, 2008).

| CI Lower Limit | CI Upper Limit | Transformed CI Lower Limit | Transformed CI Upper Limit | Description            |
|----------------|----------------|----------------------------|----------------------------|------------------------|
|                | <0.1           | >0.9                       |                            | very strong synergism  |
| 0.1            | 0.3            | 0.7                        | 0.9                        | strong synergism       |
| 0.3            | 0.7            | 0.3                        | 0.7                        | synergism              |
| 0.7            | 0.85           | 0.15                       | 0.3                        | moderate synergism     |
| 0.85           | 0.9            | 0.1                        | 0.15                       | slight synergism       |
| 0.9            | 1.1            | -0.04139269                | 0.1                        | nearly additive        |
| 1.1            | 1.2            | -0.07918125                | -0.04139269                | slight antagonism      |
| 1.2            | 1.45           | -0.16136800                | -0.07918125                | moderate antagonism    |
| 1.45           | 3.3            | -0.51851394                | -0.16136800                | antagonism             |
| 3.3            | 10             | -1                         | -0.51851394                | strong antagonism      |
| >10            |                |                            | <-1                        | very strong antagonism |

**Table S6.** Analyses of multivariate homogeneity: comparing samples containing a specific compound to other samples based on the distance matrix based on transformed combination indices.

| <b>Tebuconazole (permutations = 999)</b>  |    |                |            |         |        |
|-------------------------------------------|----|----------------|------------|---------|--------|
| <b>Average distance to median:</b>        |    | Not containing | Containing |         |        |
|                                           |    | 0.6118         | 0.7249     |         |        |
| <b>Analyses of variance</b>               | Df | Sum Sq         | Mean Sq    | F value | Pr(>F) |
| Groups                                    | 1  | 0.0811         | 0.081054   | 0.6015  | 0.446  |
| Residuals                                 | 24 | 3.2339         | 0.134745   |         |        |
| <b>S-Metolachlor (permutations = 999)</b> |    |                |            |         |        |
| <b>Average distance to median:</b>        |    | Not containing | Containing |         |        |
|                                           |    | 0.785          | 0.708      |         |        |
| <b>Analyses of variance</b>               | Df | Sum Sq         | Mean Sq    | F value | Pr(>F) |
| Groups                                    | 1  | 0.0376         | 0.037587   | 0.2384  | 0.64   |
| Residuals                                 | 24 | 3.7838         | 0.157659   |         |        |
| <b>Ibuprofen (permutations = 999)</b>     |    |                |            |         |        |
| <b>Average distance to median:</b>        |    | Not containing | Containing |         |        |
|                                           |    | 0.6994         | 0.7985     |         |        |
| <b>Analyses of variance</b>               | Df | Sum Sq         | Mean Sq    | F value | Pr(>F) |
| Groups                                    | 1  | 0.0624         | 0.062396   | 0.4688  | 0.516  |
| Residuals                                 | 24 | 3.1941         | 0.133087   |         |        |
| <b>Diclofenac (permutations = 999)</b>    |    |                |            |         |        |
| <b>Average distance to median:</b>        |    | Not containing | Containing |         |        |
|                                           |    | 0.8845         | 0.6482     |         |        |
| <b>Analyses of variance</b>               | Df | Sum Sq         | Mean Sq    | F value | Pr(>F) |
| Groups                                    | 1  | 0.35427        | 0.35427    | 2.7887  | 0.114  |
| Residuals                                 | 24 | 3.04891        | 0.12704    |         |        |
| <b>Carbamazepine (permutations = 999)</b> |    |                |            |         |        |
| <b>Average distance to median:</b>        |    | Not containing | Containing |         |        |
|                                           |    | 0.806          | 0.727      |         |        |
| <b>Analyses of variance</b>               | Df | Sum Sq         | Mean Sq    | F value | Pr(>F) |
| Groups                                    | 1  | 0.0396         | 0.039577   | 0.2759  | 0.607  |
| Residuals                                 | 24 | 3.4426         | 0.143442   |         |        |

**Table S7.** Analyses of multivariate homogeneity: comparing samples containing compound combinations included in the model of the permutational multivariate analyses of variance to other samples based on the distance matrix based on transformed combination indices.

| Ibuprofen and Diclofenac (permutations = 999)                      |    |                |            |         |        |
|--------------------------------------------------------------------|----|----------------|------------|---------|--------|
| Average distance to median:                                        |    | Not containing | Containing |         |        |
|                                                                    |    | 0.8181         | 0.7003     |         |        |
| Analyses of variance                                               | Df | Sum Sq         | Mean Sq    | F value | Pr(>F) |
| Groups                                                             | 1  | 0.07684        | 0.076843   | 0.6143  | 0.466  |
| Residuals                                                          | 24 | 3.00217        | 0.125090   |         |        |
| Tebuconazole and Carbamazepine (permutations = 999)                |    |                |            |         |        |
| Average distance to median:                                        |    | Not containing | Containing |         |        |
|                                                                    |    | 0.7694         | 0.5779     |         |        |
| Analyses of variance                                               | Df | Sum Sq         | Mean Sq    | F value | Pr(>F) |
| Groups                                                             | 1  | 0.2030         | 0.20295    | 1.5106  | 0.243  |
| Residuals                                                          | 24 | 3.2245         | 0.13435    |         |        |
| S-Metolachlor and Carbamazepine (permutations = 999)               |    |                |            |         |        |
| Average distance to median:                                        |    | Not containing | Containing |         |        |
|                                                                    |    | 0.8009         | 0.7434     |         |        |
| Analyses of variance                                               | Df | Sum Sq         | Mean Sq    | F value | Pr(>F) |
| Groups                                                             | 1  | 0.0183         | 0.018285   | 0.1273  | 0.745  |
| Residuals                                                          | 24 | 3.4462         | 0.143592   |         |        |
| Tebuconazole and S-Metolachlor (permutations = 999)                |    |                |            |         |        |
| Average distance to median:                                        |    | Not containing | Containing |         |        |
|                                                                    |    | 0.7807         | 0.7494     |         |        |
| Analyses of variance                                               | Df | Sum Sq         | Mean Sq    | F value | Pr(>F) |
| Groups                                                             | 1  | 0.0054         | 0.005397   | 0.0363  | 0.858  |
| Residuals                                                          | 24 | 3.5653         | 0.148553   |         |        |
| Tebuconazole, S-Metolachlor and Carbamazepine (permutations = 999) |    |                |            |         |        |
| Average distance to median:                                        |    | Not containing | Containing |         |        |
|                                                                    |    | 0.7929         | 0.5323     |         |        |
| Analyses of variance                                               | Df | Sum Sq         | Mean Sq    | F value | Pr(>F) |
| Groups                                                             | 1  | 0.2297         | 0.22971    | 1.7333  | 0.196  |
| Residuals                                                          | 24 | 3.1806         | 0.13253    |         |        |

**Table S8.** Analyses of multivariate homogeneity: comparing samples containing a specific compound to other samples based on the distance matrix of enhancement by terbuthylazine.

| Ibuprofen (permutations = 999)     |    |                |         |            |        |
|------------------------------------|----|----------------|---------|------------|--------|
| Average distance to median:        |    | Not containing |         | Containing |        |
|                                    |    | 3.3240         |         | 0.8372     |        |
| Analyses of variance               | Df | Sum Sq         | Mean Sq | F value    | Pr(>F) |
| Groups                             | 1  | 44.35          | 44.355  | 2.6307     | 0.094  |
| Residuals                          | 27 | 455.24         | 16.861  |            |        |
| Diclofenac (permutations = 999)    |    |                |         |            |        |
| Average distance to median:        |    | Not containing |         | Containing |        |
|                                    |    | 3.3188         |         | 0.8077     |        |
| Analyses of variance               | Df | Sum Sq         | Mean Sq | F value    | Pr(>F) |
| Groups                             | 1  | 45.23          | 45.225  | 2.757      | 0.079  |
| Residuals                          | 27 | 442.91         | 16.404  |            |        |
| Tebuconazole (permutations = 999)  |    |                |         |            |        |
| Average distance to median:        |    | Not containing |         | Containing |        |
|                                    |    | 0.7896         |         | 2.9089     |        |
| Analyses of variance               | Df | Sum Sq         | Mean Sq | F value    | Pr(>F) |
| Groups                             | 1  | 32.22          | 32.215  | 1.8659     | 0.211  |
| Residuals                          | 27 | 466.16         | 17.265  |            |        |
| S-Metolachlor (permutations = 999) |    |                |         |            |        |
| Average distance to median:        |    | Not containing |         | Containing |        |
|                                    |    | 1.782          |         | 2.053      |        |
| Analyses of variance               | Df | Sum Sq         | Mean Sq | F value    | Pr(>F) |
| Groups                             | 1  | 0.53           | 0.5331  | 0.0278     | 0.894  |
| Residuals                          | 27 | 517.84         | 19.1793 |            |        |
| Carbamazepine (permutations = 999) |    |                |         |            |        |
| Average distance to median:        |    | Not containing |         | Containing |        |
|                                    |    | 0.9497         |         | 2.7849     |        |
| Analyses of variance               | Df | Sum Sq         | Mean Sq | F value    | Pr(>F) |
| Groups                             | 1  | 24.39          | 24.390  | 1.382      | 0.322  |
| Residuals                          | 27 | 476.51         | 17.648  |            |        |



**Table S9.** Analyses of multivariate homogeneity: comparing samples containing compound combinations included in the model of the permutational multivariate analyses of variance to other samples based on the distance matrix of enhancement by Terbutylazine.

| Ibuprofen & Diclofenac (permutations = 999)       |    |                |            |         |        |
|---------------------------------------------------|----|----------------|------------|---------|--------|
| Average distance to median:                       |    | Not containing | Containing |         |        |
|                                                   |    | 2.2907         | 0.9689     |         |        |
| Analyses of variance                              | Df | Sum Sq         | Mean Sq    | F value | Pr(>F) |
| Groups                                            | 1  | 44481          | 10.121     | 0.5679  | 0.569  |
| Residuals                                         | 27 | 481.17         | 17.821     |         |        |
| Ibuprofen & Tebuconazole (permutations = 999)     |    |                |            |         |        |
| Average distance to median:                       |    | Not containing | Containing |         |        |
|                                                   |    | 2.3865         | 0.6764     |         |        |
| Analyses of variance                              | Df | Sum Sq         | Mean Sq    | F value | Pr(>F) |
| Groups                                            | 1  | 16.94          | 16.941     | 0.9744  | 0.343  |
| Residuals                                         | 27 | 469.44         | 17.387     |         |        |
| Diclofenac & Tebuconazole (permutations = 999)    |    |                |            |         |        |
| Average distance to median:                       |    | Not containing | Containing |         |        |
|                                                   |    | 2.3508         | 0.8088     |         |        |
| Analyses of variance                              | Df | Sum Sq         | Mean Sq    | F value | Pr(>F) |
| Groups                                            | 1  | 13.77          | 13.775     | 0.7842  | 0.423  |
| Residuals                                         | 27 | 474.28         | 17.566     |         |        |
| Ibuprofen & S-Metolachlor (permutations = 999)    |    |                |            |         |        |
| Average distance to median:                       |    | Not containing | Containing |         |        |
|                                                   |    | 2.4727         | 0.5758     |         |        |
| Analyses of variance                              | Df | Sum Sq         | Mean Sq    | F value | Pr(>F) |
| Groups                                            | 1  | 20.84          | 20.844     | 1.2016  | 0.248  |
| Residuals                                         | 27 | 468.37         | 17.347     |         |        |
| Diclofenac & S-Metolachlor (permutations = 999)   |    |                |            |         |        |
| Average distance to median:                       |    | Not containing | Containing |         |        |
|                                                   |    | 2.4620         | 0.5749     |         |        |
| Analyses of variance                              | Df | Sum Sq         | Mean Sq    | F value | Pr(>F) |
| Groups                                            | 1  | 20.63          | 20.631     | 1.1483  | 0.274  |
| Residuals                                         | 27 | 485.10         | 17.967     |         |        |
| Tebuconazole & S-Metolachlor (permutations = 999) |    |                |            |         |        |
| Average distance to median:                       |    | Not containing | Containing |         |        |
|                                                   |    | 1.376          | 3.514      |         |        |
| Analyses of variance                              | Df | Sum Sq         | Mean Sq    | F value | Pr(>F) |
| Groups                                            | 1  | 26.47          | 26.471     | 1.4179  | 0.189  |
| Residuals                                         | 27 | 504.08         | 18.670     |         |        |
| Ibuprofen & Carbamazepine (permutations = 999)    |    |                |            |         |        |
| Average distance to median:                       |    | Not containing | Containing |         |        |
|                                                   |    | 2.3475         | 0.7299     |         |        |
| Analyses of variance                              | Df | Sum Sq         | Mean Sq    | F value | Pr(>F) |
| Groups                                            | 1  | 15.16          | 15.159     | 0.8138  | 0.448  |
| Residuals                                         | 27 | 502.96         | 18.628     |         |        |

**Table S10.** Analyses of multivariate homogeneity: comparing samples containing compound combinations included in the model of the permutational multivariate analyses of variance to other samples based on the distance matrix of enhancement by terbuthylazine.

| Diclofenac & Carbamazepine (permutations = 999)                |    |                |            |         |        |
|----------------------------------------------------------------|----|----------------|------------|---------|--------|
| Average distance to median:                                    |    | Not containing | Containing |         |        |
|                                                                |    | 2.370          | 0.854      |         |        |
| Analyses of variance                                           | Df | Sum Sq         | Mean Sq    | F value | Pr(>F) |
| Groups                                                         | 1  | 13.32          | 13.316     | 0.7481  | 0.479  |
| Residuals                                                      | 27 | 480.58         | 17.799     |         |        |
| S-Metolachlor & Carbamazepine (permutations = 999)             |    |                |            |         |        |
| Average distance to median:                                    |    | Not containing | Containing |         |        |
|                                                                |    | 1.534          | 2.980      |         |        |
| Analyses of variance                                           | Df | Sum Sq         | Mean Sq    | F value | Pr(>F) |
| Groups                                                         | 1  | 44543          | 12.127     | 0.6212  | 0.545  |
| Residuals                                                      | 27 | 527.12         | 19.523     |         |        |
| Ibuprofen & Diclofenac & Tebuconazole (permutations = 999)     |    |                |            |         |        |
| Average distance to median:                                    |    | Not containing | Containing |         |        |
|                                                                |    | 2.1041         | 0.6308     |         |        |
| Analyses of variance                                           | Df | Sum Sq         | Mean Sq    | F value | Pr(>F) |
| Groups                                                         | 1  | 7.48           | 7.4845     | 0.4229  | 0.474  |
| Residuals                                                      | 27 | 477.90         | 17.6999    |         |        |
| Ibuprofen & Diclofenac & S-Metolachlor (permutations = 999)    |    |                |            |         |        |
| Average distance to median:                                    |    | Not containing | Containing |         |        |
|                                                                |    | 2.1515         | 0.6405     |         |        |
| Analyses of variance                                           | Df | Sum Sq         | Mean Sq    | F value | Pr(>F) |
| Groups                                                         | 1  | 7.87           | 7.8727     | 0.4446  | 0.439  |
| Residuals                                                      | 27 | 478.10         | 17.7075    |         |        |
| Ibuprofen & Tebuconazole & S-Metolachlor (permutations = 999)  |    |                |            |         |        |
| Average distance to median:                                    |    | Not containing | Containing |         |        |
|                                                                |    | 2.1457         | 0.6966     |         |        |
| Analyses of variance                                           | Df | Sum Sq         | Mean Sq    | F value | Pr(>F) |
| Groups                                                         | 1  | 44401          | 7.2414     | 0.4099  | 0.487  |
| Residuals                                                      | 27 | 476.95         | 17.6648    |         |        |
| Diclofenac & Tebuconazole & S-Metolachlor (permutations = 999) |    |                |            |         |        |
| Average distance to median:                                    |    | Not containing | Containing |         |        |
|                                                                |    | 2.1302         | 0.7897     |         |        |
| Analyses of variance                                           | Df | Sum Sq         | Mean Sq    | F value | Pr(>F) |
| Groups                                                         | 1  | 44367          | 6.196      | 0.3431  | 0.57   |
| Residuals                                                      | 27 | 487.57         | 18.058     |         |        |
| Ibuprofen & Diclofenac & Carbamazepine (permutations = 999)    |    |                |            |         |        |
| Average distance to median:                                    |    | Not containing | Containing |         |        |
|                                                                |    | 2.071          | 1.185      |         |        |
| Analyses of variance                                           | Df | Sum Sq         | Mean Sq    | F value | Pr(>F) |
| Groups                                                         | 1  | 2.71           | 2.7079     | 0.1487  | 0.872  |
| Residuals                                                      | 27 | 491.63         | 18.2084    |         |        |

**Table S11.** Analyses of multivariate homogeneity: comparing samples containing compound combinations included in the model of the permutational multivariate analyses of variance to other samples based on the distance matrix of enhancement by terbuthylazine.

| Ibuprofen & S-Metolachlor & Carbamazepine (permutations = 999)              |    |                |            |         |        |
|-----------------------------------------------------------------------------|----|----------------|------------|---------|--------|
| Average distance to median:                                                 |    | Not containing | Containing |         |        |
|                                                                             |    | 2.1908         | 0.2503     |         |        |
| Analyses of variance                                                        | Df | Sum Sq         | Mean Sq    | F value | Pr(>F) |
| Groups                                                                      | 1  | 12.99          | 12.986     | 0.7132  | 0.239  |
| Residuals                                                                   | 27 | 491.58         | 18.207     |         |        |
| Diclofenac & S-Metolachlor & Carbamazepine (permutations = 999)             |    |                |            |         |        |
| Average distance to median:                                                 |    | Not containing | Containing |         |        |
|                                                                             |    | 2.2024         | 0.1945     |         |        |
| Analyses of variance                                                        | Df | Sum Sq         | Mean Sq    | F value | Pr(>F) |
| Groups                                                                      | 1  | 13.90          | 13.903     | 0.7676  | 0.211  |
| Residuals                                                                   | 27 | 489.06         | 18.113     |         |        |
| Ibuprofen & Diclofenac & S-Metolachlor & Carbamazepine (permutations = 999) |    |                |            |         |        |
| Average distance to median:                                                 |    | Not containing | Containing |         |        |
|                                                                             |    | 2.0618         | 0.1195     |         |        |
| Analyses of variance                                                        | Df | Sum Sq         | Mean Sq    | F value | Pr(>F) |
| Groups                                                                      | 1  | 44379          | 7.0248     | 0.3913  | 0.155  |
| Residuals                                                                   | 27 | 484.75         | 17.9536    |         |        |

## Supplementary Figures

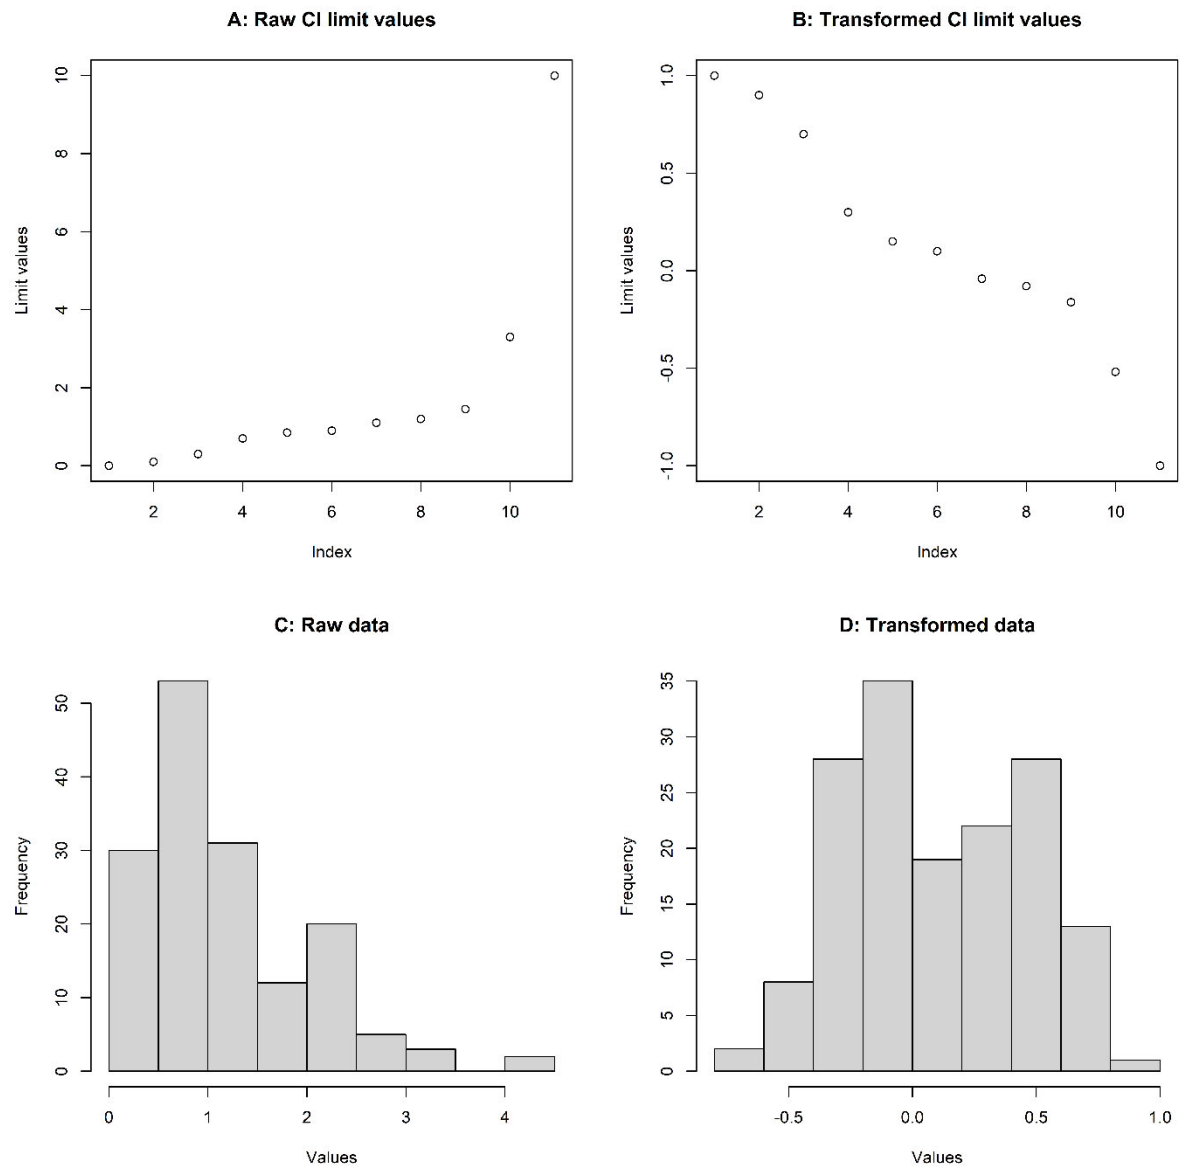

**Figure S1.** (A) Raw CI limits; (B) Transformed CI value limit; (C) RAW CI data distribution; (D) Transformed CI data distribution.

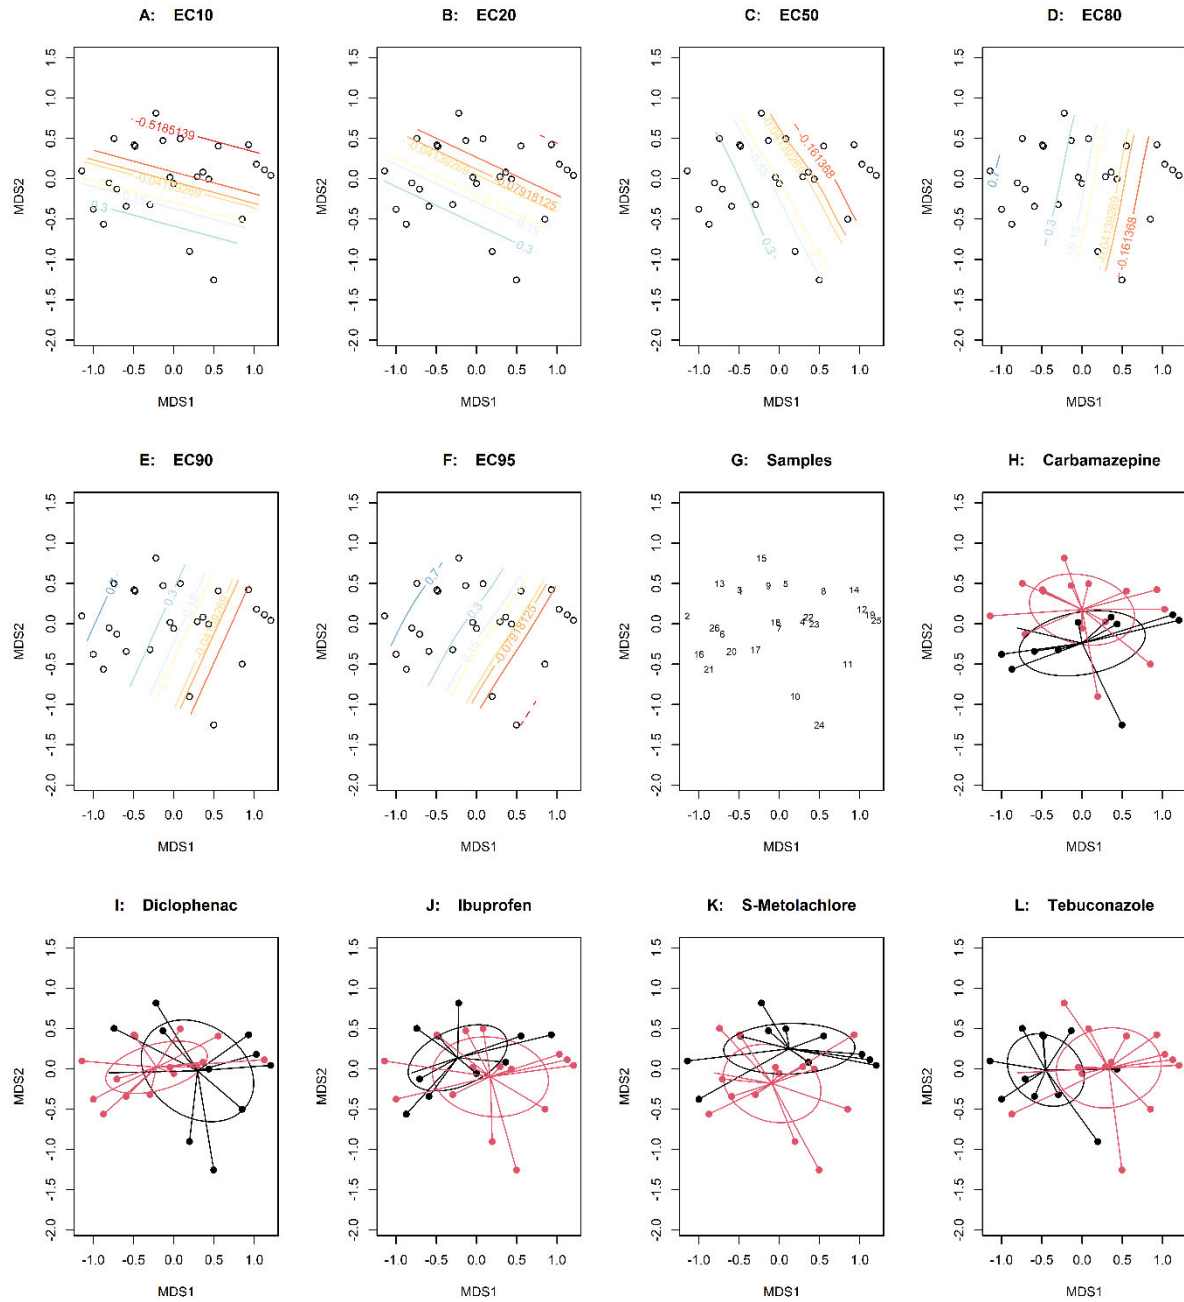

**Figure S2.** Effect level contours and compounds in Non-Metric Multidimensional scaling ordinations based on Euclidean distances of transformed combination indices. **(A)** Contours of transformed combination index values at 10% effect level. Strength of synergy (blue) and antagonism (red) is shown by color and intensity; **(B)** Contours of transformed combination index values at 20% effect level. Strength of synergy (blue) and antagonism (red) is shown by color and intensity; **(C)** Contours of transformed combination index values at 50% effect level. Strength of synergy (blue) and antagonism (red) is shown by color and intensity; **(D)** Contours of transformed combination index values at 80% effect level. Strength of synergy (blue) and antagonism (red) is shown by color and intensity; **(E)** Contours of transformed combination index values at 90% effect level. Strength of synergy (blue) and antagonism (red) is shown by color and intensity; **(F)** Contours of transformed combination index values at 95% effect level. Strength of synergy (blue) and antagonism (red) is shown by color and intensity ; **(G)** Samples. 1: Carbamazepine + Diclofenac; 2: Carbamazepine + Diclofenac + Ibuprofen; 3: Carbamazepine + Diclofenac + Ibuprofen + S-metolachlor; 4: Carbamazepine + Diclofenac + Ibuprofen + S-metolachlor + Tebuconazole; 5: Carbamazepine + Diclofenac + Ibuprofen + Tebuconazole; 6: Carbamazepine + Diclofenac + S-metolachlor; 7: Carbamazepine + Diclofenac + S-metolachlor + Tebuconazole; 8: Carbamazepine + Diclofenac + Tebuconazole; 9: Carbamazepine + Ibuprofen; 10: Carbamazepine + Ibuprofen + S-metolachlor; 11: Carbamazepine + Ibuprofen + S-metolachlor + Tebuconazole.

profen + S-metolachlor + Tebuconazole; 12: Carbamazepine + Ibuprofen + Tebuconazole; 13: Carbamazepine + S-metolachlor; 14: Carbamazepine + S-metolachlor + Tebuconazole; 15: Carbamazepine + Tebuconazole; 16: Diclofenac + Ibuprofen; 17: Diclofenac + Ibuprofen + S-metolachlor; 18: Diclofenac + Ibuprofen + S-metolachlor + Tebuconazole; 19: Diclofenac + Ibuprofen + Tebuconazole; 20: Diclofenac + S-metolachlor; 21: Diclofenac + S-metolachlor + Tebuconazole; 22: Diclofenac + Tebuconazole; 23: Ibuprofen + S-metolachlor; 24: Ibuprofen + S-metolachlor + Tebuconazole; 25: Ibuprofen + Tebuconazole; 26: S-metolachlor + Tebuconazole; (H) Carbamazepine; (I) Diclofenac; (J) Ibuprofen; (K) S-metolachlor; (L): Tebuconazole.

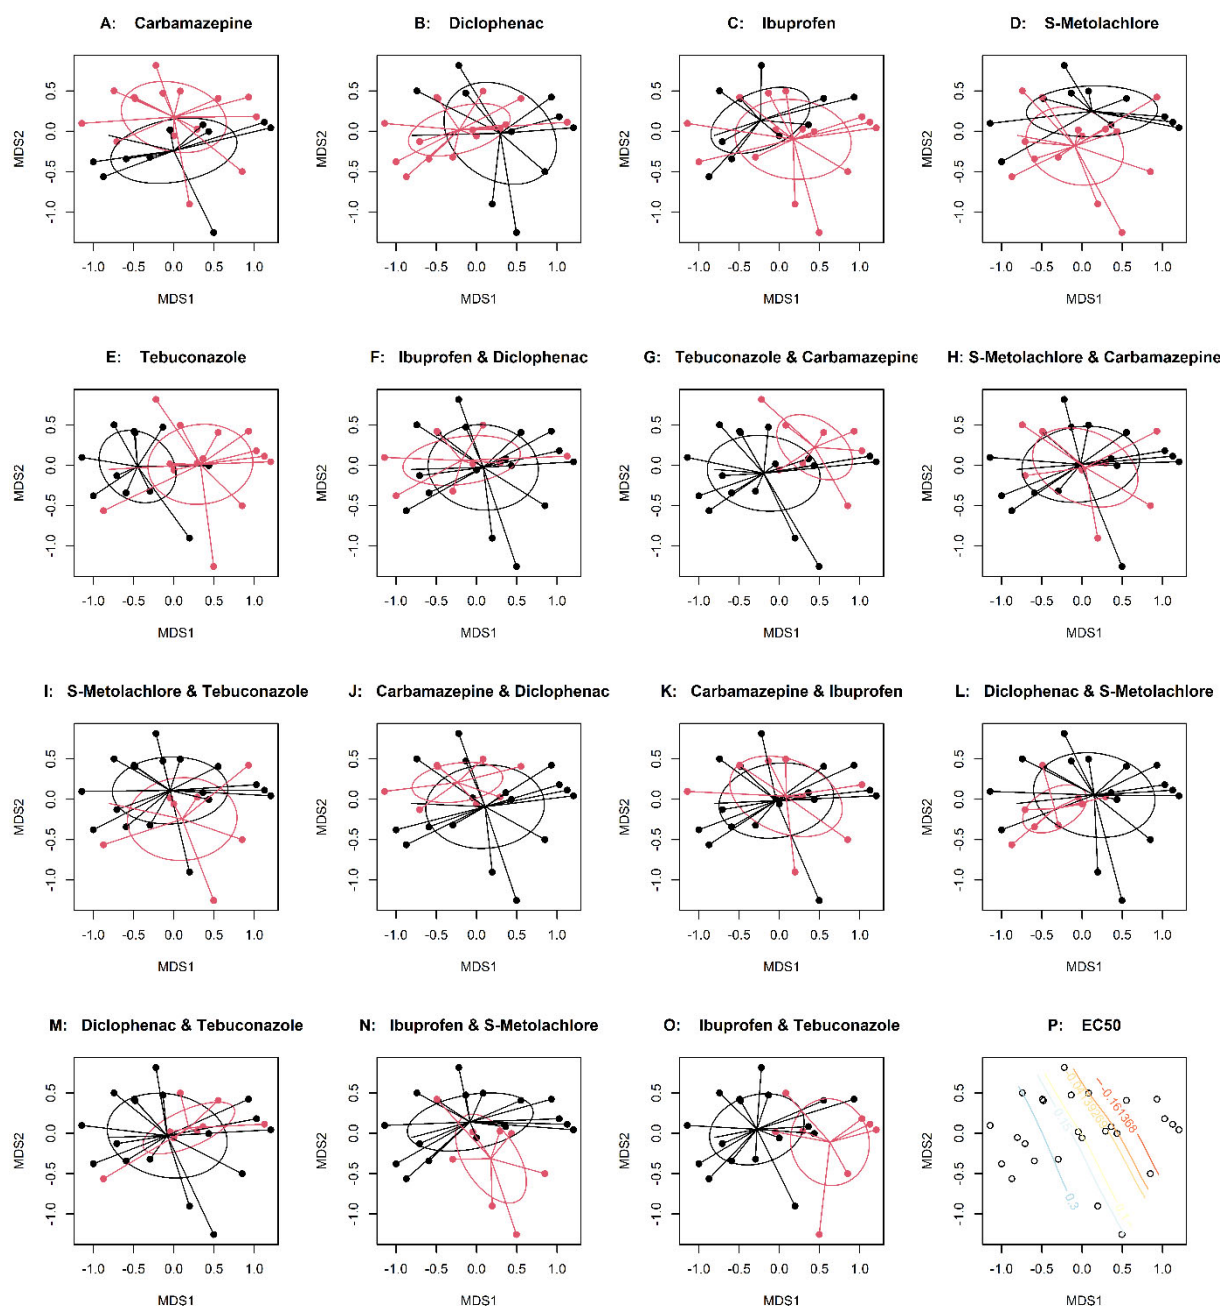

**Figure S3.** Non-Metric Multidimensional scaling ordinations based on Euclidean distances of transformed combination indices by compounds. (A) Carbamazepine; (B) Diclofenac; (C) Ibuprofen; (D) S-Metolachlor; (E) Tebuconazole; (F) Ibuprofen & Diclofenac; (G) Tebuconazole & Carbamazepine; (H) S-Metolachlor & Carbamazepine; (I) S-Metolachlor & Tebuconazole; (J) Carbamazepine & Diclofenac; (K) Carbamazepine & Ibuprofen; (L) Diclofenac & S-Metolachlor; (M) Diclofenac & Tebuconazole; (N) Ibuprofen & S-Metolachlor; (O) Ibuprofen & Tebuconazole; (P) Contours of transformed combination index values at 50% effect level. Strength of synergy (blue) and antagonism (red) is shown by color and intensity.

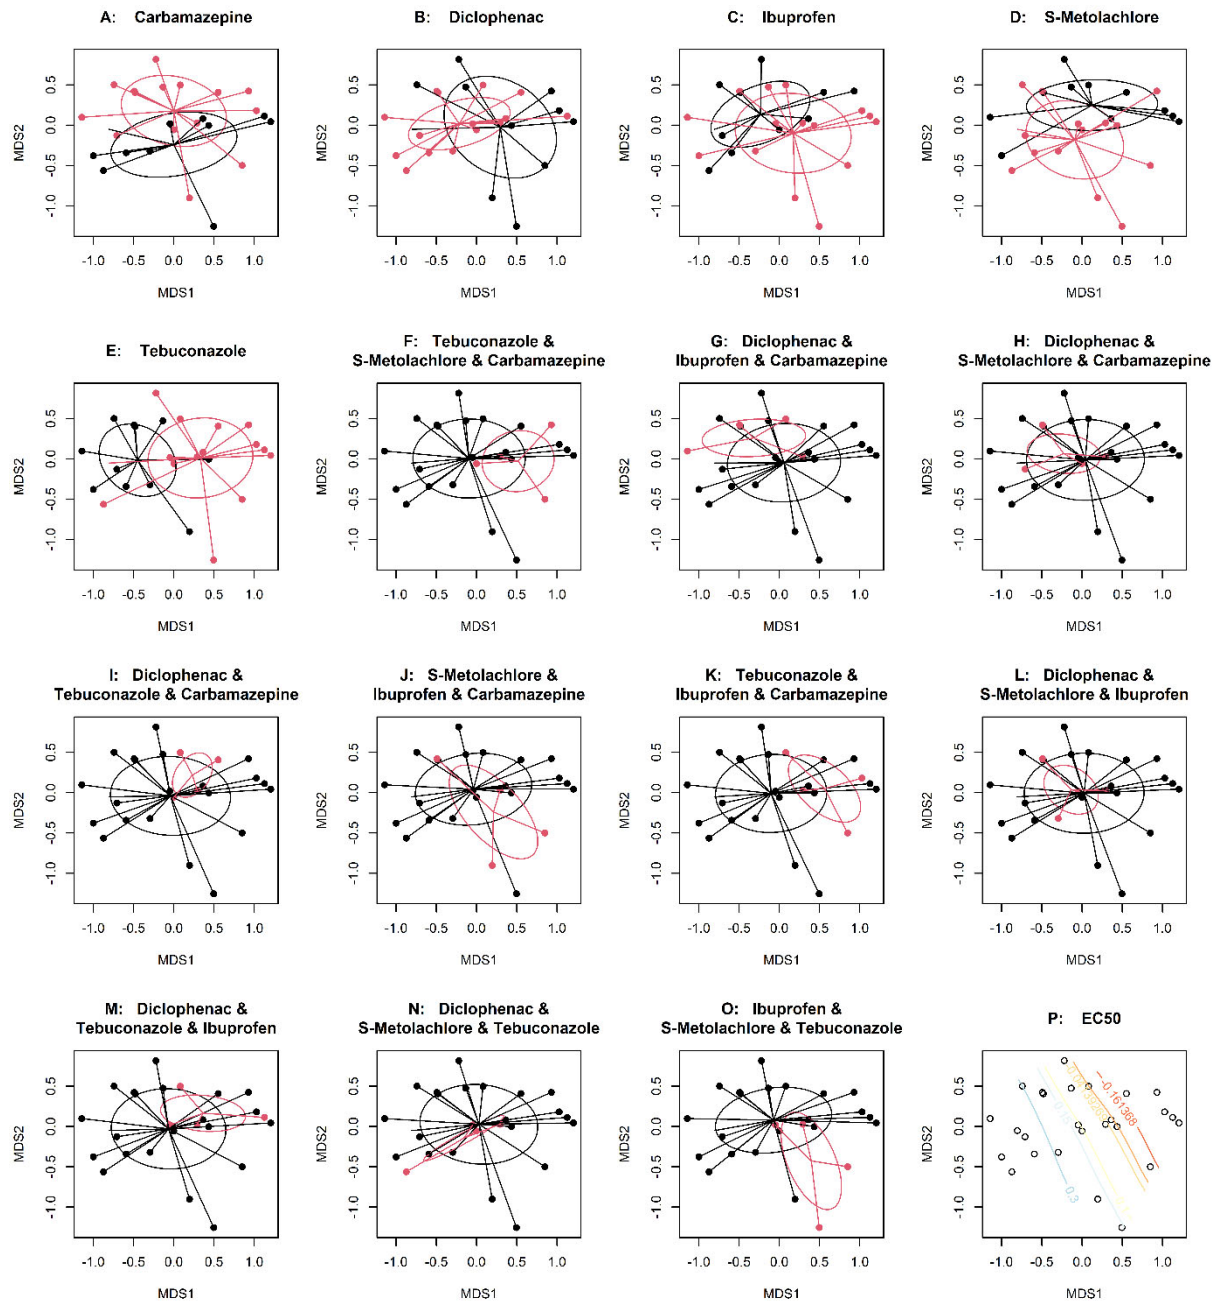

**Figure S4.** Non-Metric Multidimensional scaling ordinations based on Euclidean distances of transformed combination indices by compounds. (A) Carbamazepine; (B) Diclofenac; (C) Ibuprofen; (D) S-metolachlor; (E) Tebuconazole; (F) Ibuprofen & Diclofenac; (G) Tebuconazole & S-metolachlor & Carbamazepine; (H) Diclofenac & Ibuprofen & Carbamazepine; (I) Diclofenac & S-metolachlor & Carbamazepine; (J) Diclofenac & Tebuconazole & Carbamazepine; (K) S-metolachlor & Ibuprofen & Carbamazepine; (L) Tebuconazole & Ibuprofen & Carbamazepine; (M) Diclofenac & S-metolachlor & Ibuprofen; (N) Diclofenac & Tebuconazole & Ibuprofen; (O) Ibuprofen & S-metolachlor & Tebuconazole; (P) Contours of transformed combination index values at 50% effect level. Strength of synergy (blue) and antagonism (red) is shown by color and intensity.



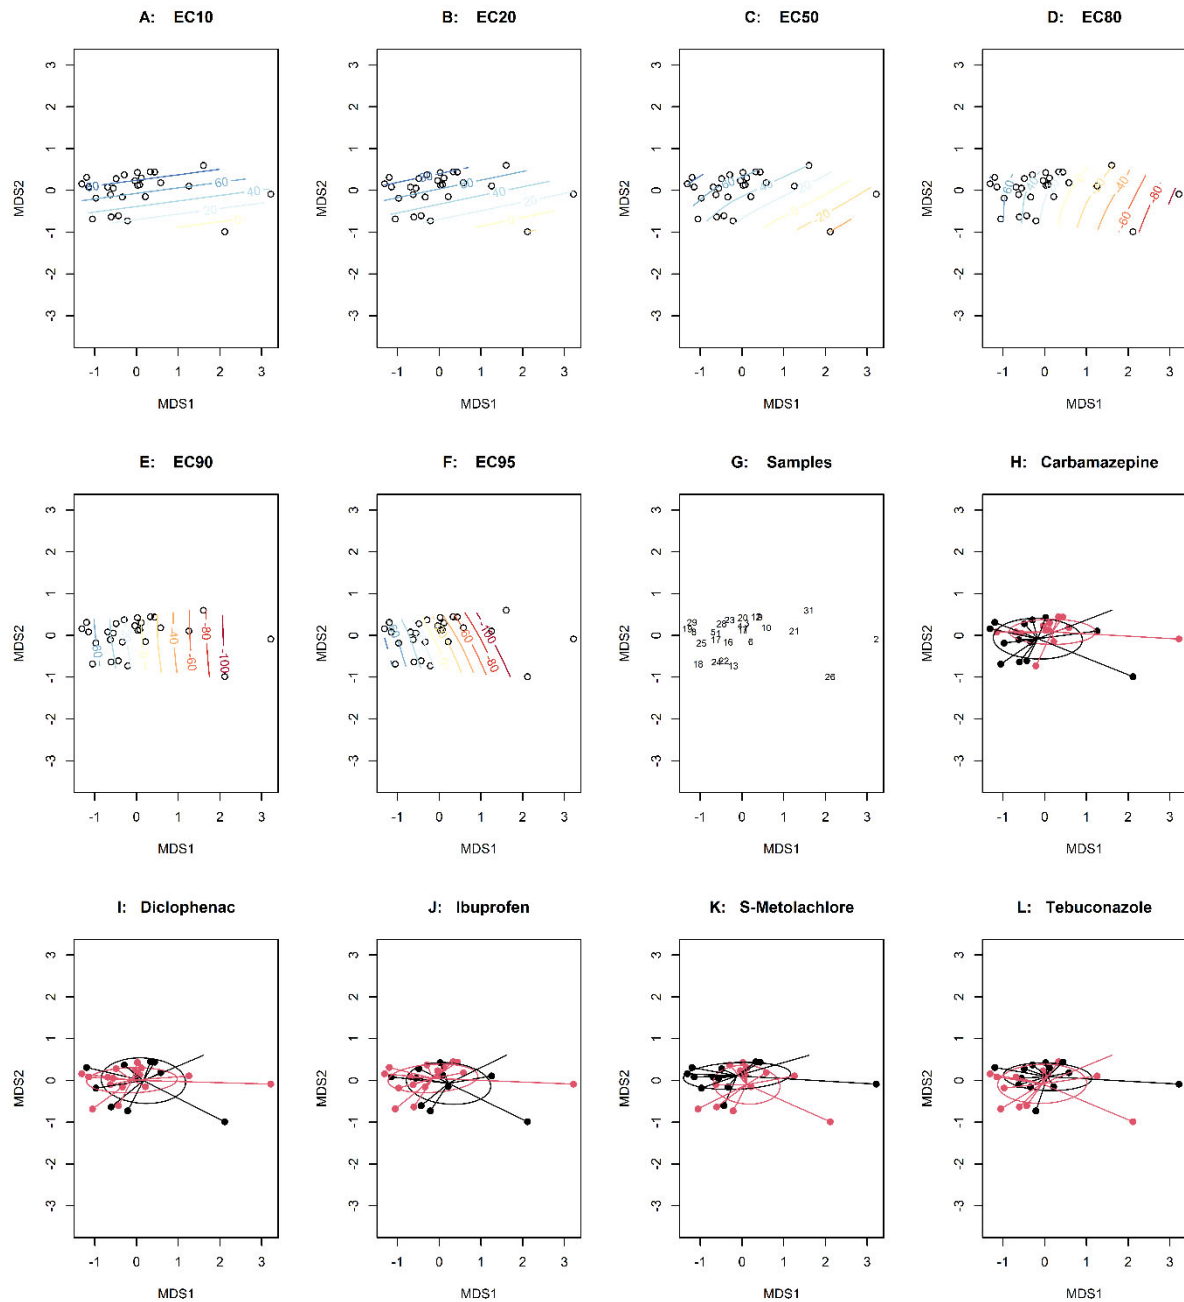

**Figure S5.** Effect level contours and compounds in Non-Metric Multidimensional scaling ordinations based on Euclidean distances of enhancement by Terbuthylazine. (A) Contours of enhancement by Terbuthylazine at 10% effect level. Strength of enhancement is shown by color and intensity, where blue is increase and red is decrease; (B) Contours of enhancement by Terbuthylazine at 20% effect level. Strength of enhancement is shown by color and intensity, where blue is increase and red is decrease; (C) Contours of enhancement by Terbuthylazine at 50% effect level. Strength of enhancement is shown by color and intensity, where blue is increase and red is decrease; (D) Contours of enhancement by Terbuthylazine at 80% effect level. Strength of enhancement is shown by color and intensity, where blue is increase and red is decrease; (E) Contours of enhancement by Terbuthylazine at 90% effect level. Strength of enhancement is shown by color and intensity, where blue is increase and red is decrease; (F) Contours of enhancement by Terbuthylazine at 95% effect level. Strength of enhancement is shown by color and intensity, where blue is increase and red is decrease; (G) Samples \*. 1: Carbamazepine + Diclofenac + Terbuthylazine. 2: Carbamazepine + Diclofenac + Ibuprofen + Terbuthylazine. 3: Carbamazepine + Diclofenac + Ibuprofen + S-metolachlor + Terbuthylazine. 4: Carbamazepine + Diclofenac + Ibuprofen + S-metolachlor + Tebuconazole + Terbuthylazine. 5: Carbamazepine + Diclofenac + Ibuprofen + Tebuconazole + Terbuthylazine. 6: Carbamazepine + Diclofenac + S-metolachlor + Terbuthylazine. 7: Carbamazepine + Diclofenac + S-



metolachlor + Tebuconazole + Terbutylazine. 8: Carbamazepine + Diclofenac + Tebuconazole + Terbutylazine. 9: Carbamazepine + Ibuprofen + Terbutylazine. 10: Carbamazepine + Ibuprofen + S-metolachlor + Terbutylazine. 11: Carbamazepine + Ibuprofen + S-metolachlor + Tebuconazole + Terbutylazine. 12: Carbamazepine + Ibuprofen + Tebuconazole + Terbutylazine. 13: Carbamazepine + S-metolachlor + Terbutylazine. 16: Diclofenac + Ibuprofen + Terbutylazine. 17: Diclofenac + Ibuprofen + S-metolachlor + Terbutylazine. 18: Diclofenac + Ibuprofen + S-metolachlor + Tebuconazole + Terbutylazine. 19: Diclofenac + Ibuprofen + Tebuconazole + Terbutylazine. 20: Diclofenac + S-metolachlor + Terbutylazine. 21: Diclofenac + S-metolachlor + Tebuconazole + Terbutylazine. 22: Diclofenac + Tebuconazole + Terbutylazine. 23: Ibuprofen + S-metolachlor + Terbutylazine. 24: Ibuprofen + S-metolachlor + Tebuconazole + Terbutylazine. 25: Ibuprofen + Tebuconazole + Terbutylazine. 26: S-metolachlor + Tebuconazole + Terbutylazine. 28: Diclofenac + Terbutylazine. 29: Ibuprofen + Terbutylazine. 31: Tebuconazole + Terbutylazine. \* Excluded samples: 14: Carbamazepine + S-metolachlor + Tebuconazole + Terbutylazine. 15: Carbamazepine + Tebuconazole + Terbutylazine. 27: Carbamazepine + Terbutylazine. 30: S-metolachlor + Terbutylazine; (H) Carbamazepine; (I) Diclofenac; (J) Ibuprofen; (K) S-metolachlor; (L) Tebuconazole.

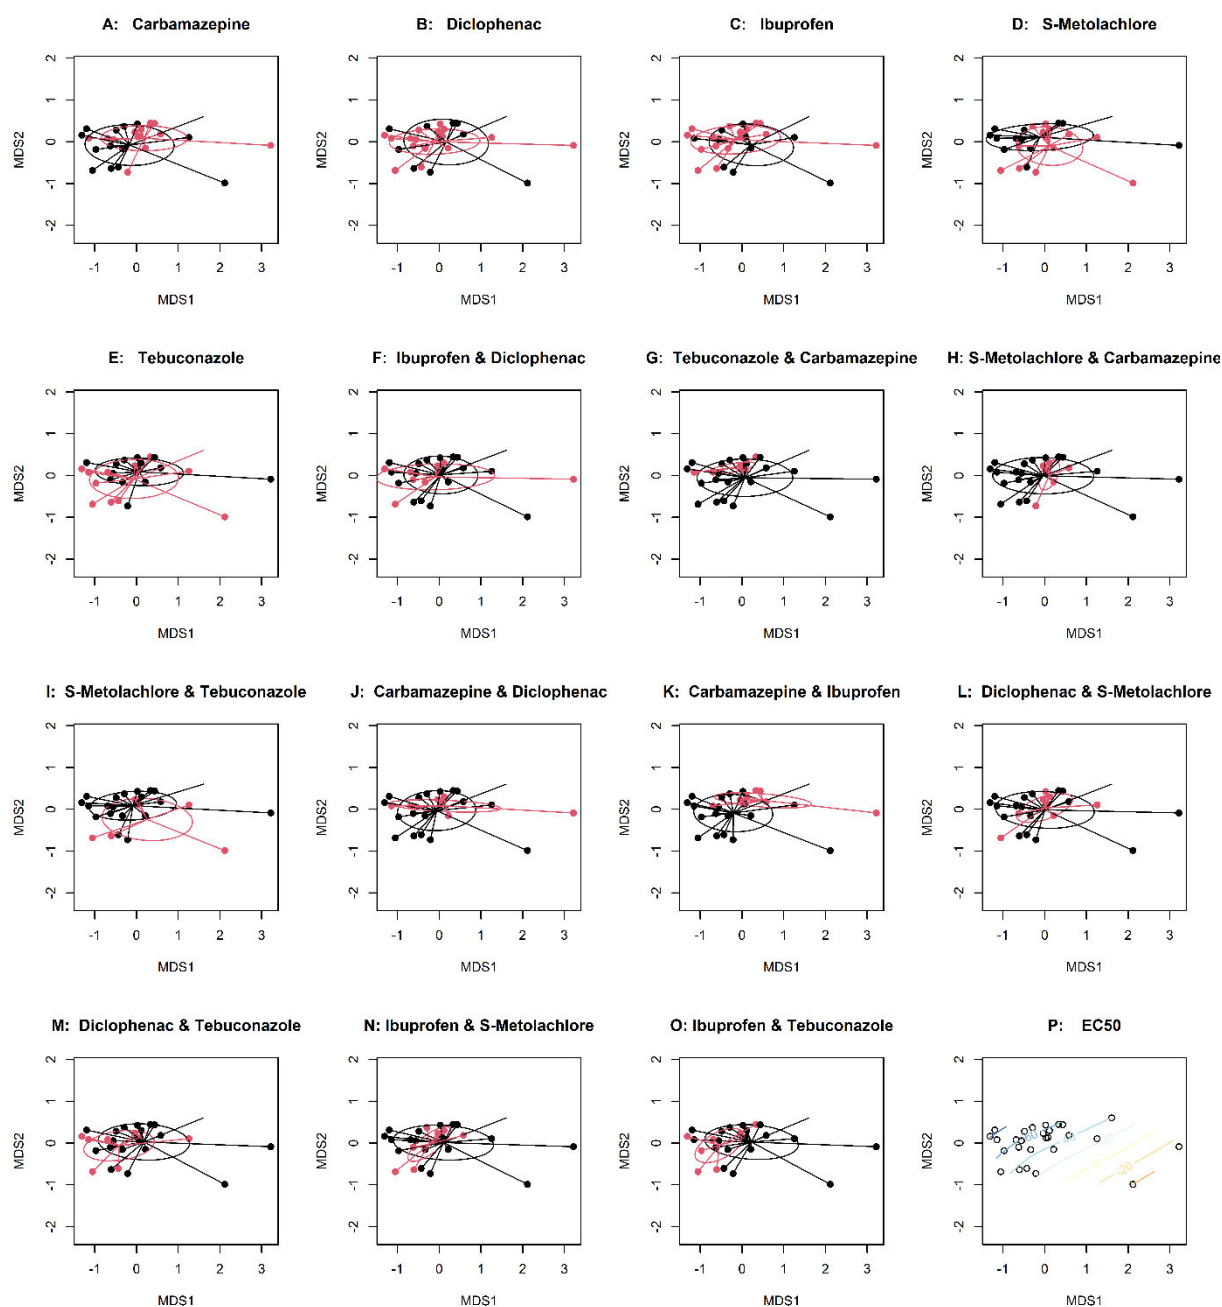

**Figure S6.** Non-Metric Multidimensional scaling ordinations based on Euclidean distances of enhancement by Terbutylazine by compounds and compound combinations. (A) Carbamazepine; (B)

Diclofenac; (C) Ibuprofen; (D) S-metolachlor; (E) Tebuconazole; (F) Ibuprofen & Diclofenac; (G) Tebuconazole & Carbamazepine; (H) S-metolachlor & Carbamazepine; (I) S-metolachlor & Tebuconazole; (J) Carbamazepine & Diclofenac; (K) Carbamazepine & Ibuprofen; (L) Diclofenac & S-metolachlor; (M) Diclofenac & Tebuconazole; (N) Ibuprofen & S-metolachlor; (O) Ibuprofen & Tebuconazole; (P) Contours of enhancement by Terbutylazine at 50% effect level. Strength of enhancement is shown by color and intensity, where blue is increase and red is decrease.

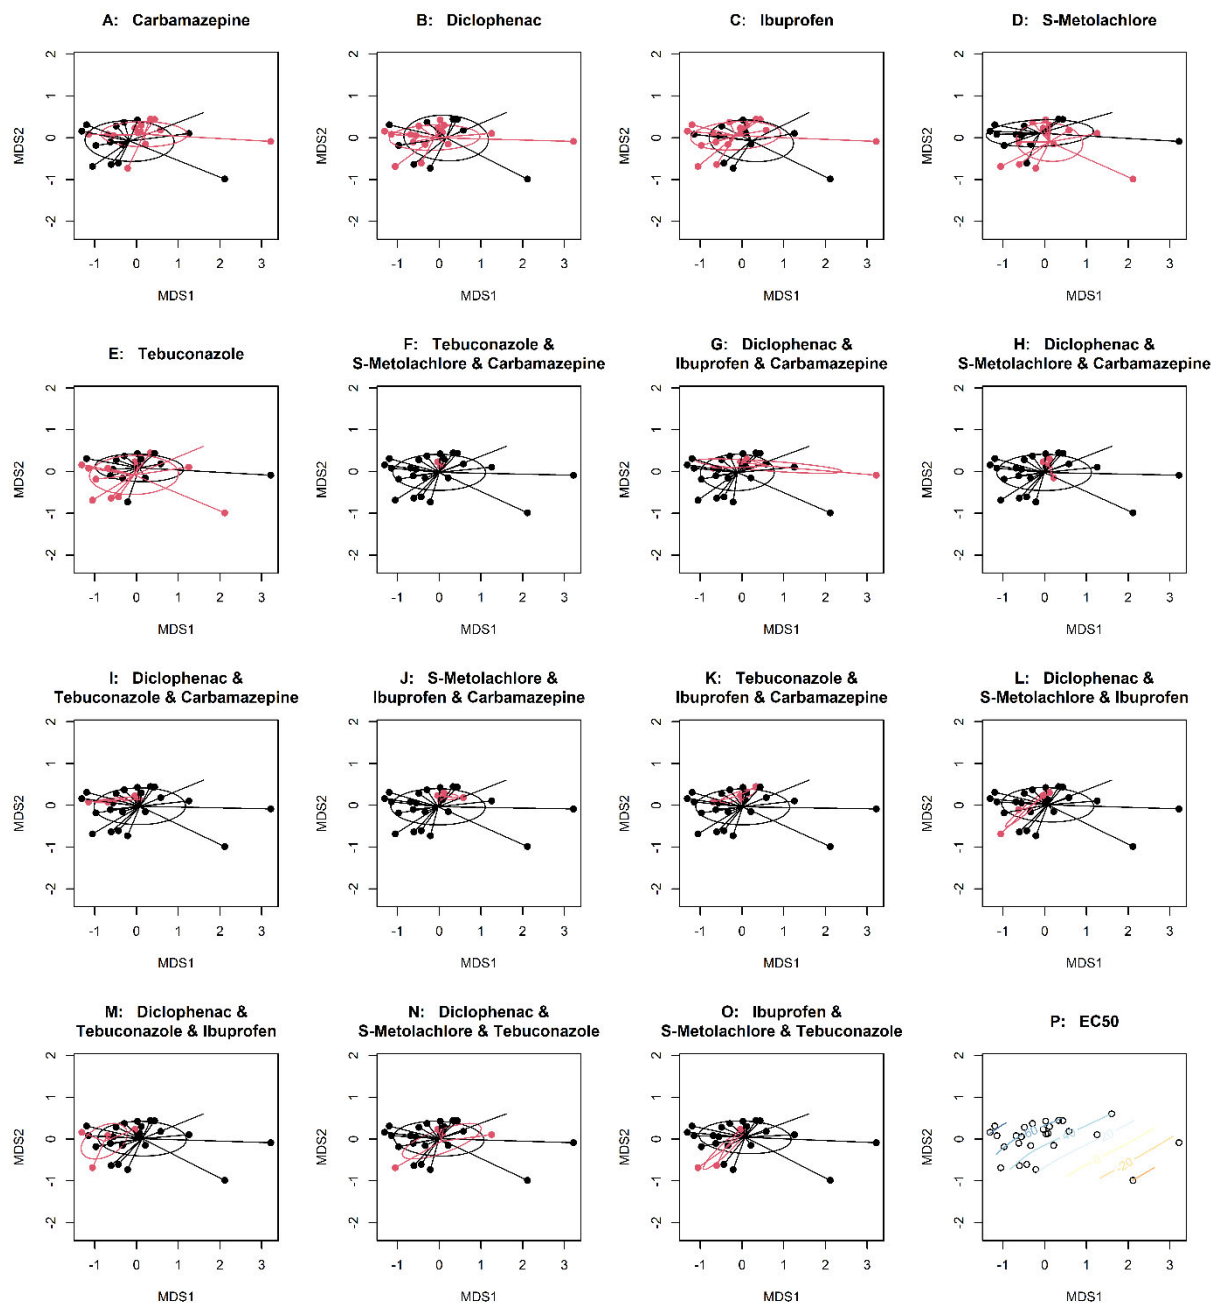

**Figure S7.** Non-Metric Multidimensional scaling ordinations based on Euclidean distances of enhancement by Terbutylazine by compounds and compound combinations. A: Carbamazepine; B: Diclofenac; C: Ibuprofen; D: S-metolachlor; E: Tebuconazole; F: Tebuconazole & S-metolachlor & Carbamazepine; G: Diclofenac & Ibuprofen & Carbamazepine; H: Diclofenac & S-metolachlor & Carbamazepine; I: Diclofenac & Tebuconazole & Carbamazepine; J: S-metolachlor & Ibuprofen & Carbamazepine; K: Tebuconazole & Ibuprofen & Carbamazepine; L: Diclofenac & S-metolachlor & Ibuprofen; M: Diclofenac & Tebuconazole & Ibuprofen; N: Diclofenac & S-metolachlor & Tebuconazole; O: Ibuprofen & S-metolachlor & Tebuconazole; P: Contours of enhancement by Terbutylazine at 50% effect level. Strength of enhancement is shown by color and intensity, where blue is increase and red is decrease.

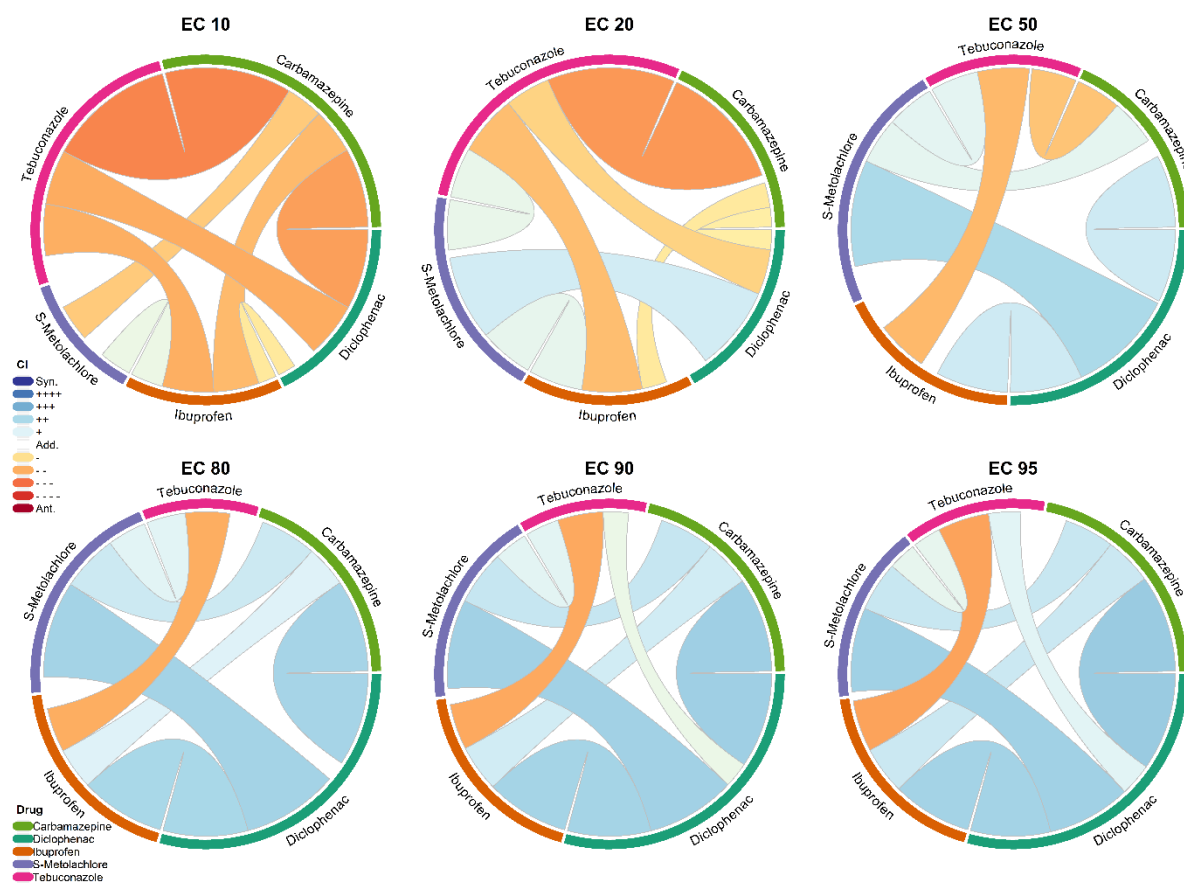

**Figure S8.** Weighted mean of transformed Combination Indexes of compound pairs from all the combinations where the chemicals were present in the examined combinations at effect sizes 10%, 20%, 50%, 80%, 90%, and 95%. The strength of synergy (blue) and antagonism (red) is shown by the width of linkage and color intensity.
